# Supplementary material
Source: PubMed Central journal article supplement (PMC7504932)
Supplement: supp_RA120.014142_160526_1_supp_572862_qm8mbb.pdf [file supp_RA120.014142_160526_1_supp_572862_qm8mbb.pdf]

## Supporting information

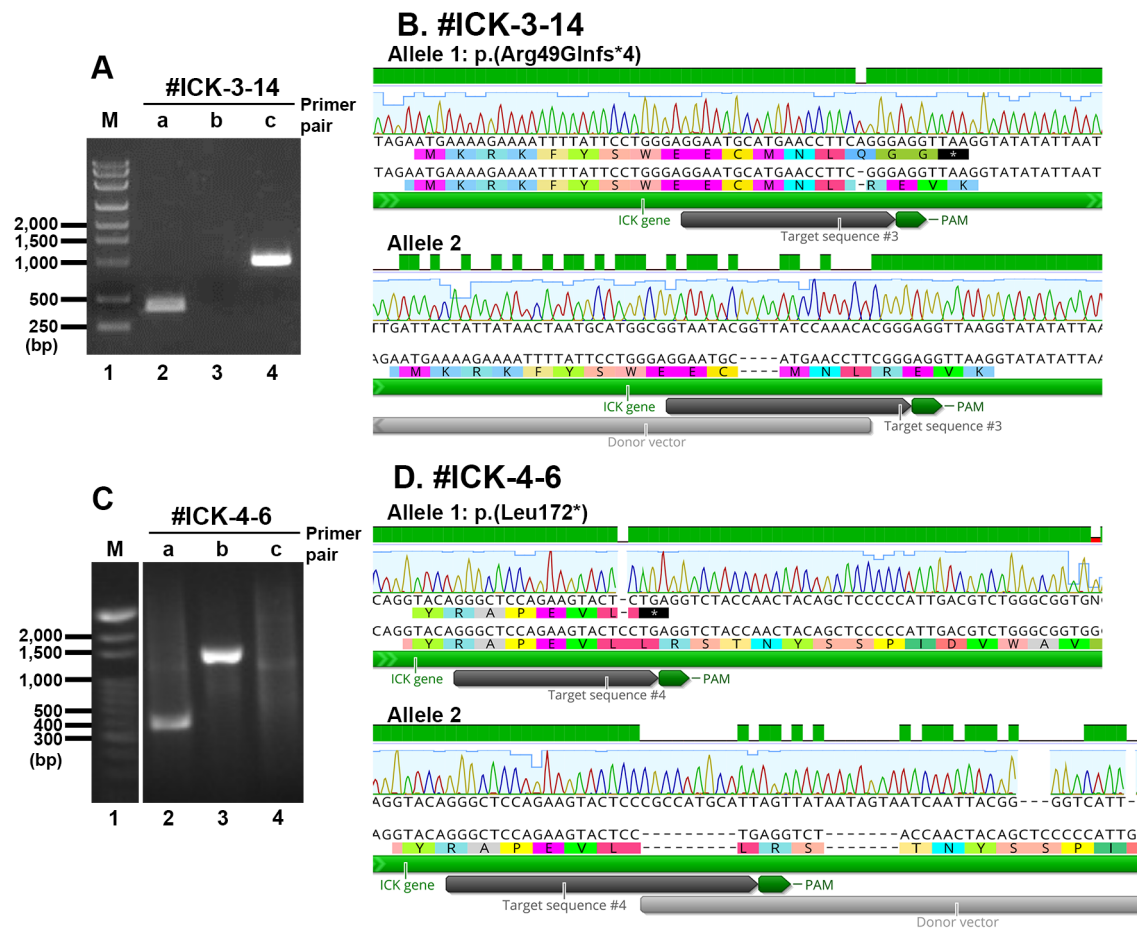

**Fig. S1. Genomic PCR and sequence analyses of the *ICK*-KO cell lines**

(A, C) Genomic DNA extracted from the *ICK*-KO cell lines #ICK-3-14 (A) and #ICK-4-6 (C), which were established using a donor knock-in vector containing distinct target sequences, were subjected to PCR analysis using the indicated primer sets (see Table S2, #3 and #4) to detect alleles with a small indel or no insertion (a), or with forward (b) or reverse (c) integration of the donor knock-in vector. M, molecular weight markers (A, pPSU1+ ladder; C, PSU 100bp ladder). (B and D) Alignments of allele sequences of the #ICK-3-14 (B) and #ICK-4-6 (D) cell lines determined by sequencing of the PCR products shown in (A) and (C). Positions of the target sequence and PAM sequence, and insertion sites of the donor knock-in vector are indicated.

**Table S1. Plasmids used in this study**

| Vector                          | Insert       | Reference                     |
|---------------------------------|--------------|-------------------------------|
| pCAG-EGFP-C                     | ICK          | This study                    |
| pCAG-EGFP-C                     | ICK(1–287)   | This study                    |
| pCAG-EGFP-C                     | ICK(285–632) | This study                    |
| pCAG-EGFP-C                     | ICK(285–561) | This study                    |
| pCAG-EGFP-C                     | ICK(285–537) | This study                    |
| pCAG-EGFP-C                     | ICK(285–501) | This study                    |
| pCAG-EGFP-C                     | ICK(285–473) | This study                    |
| pCAG-EGFP-C                     | ICK(285–361) | This study                    |
| pmCherry-C                      | IFT22        | (Takei <i>et al.</i> , 2016)  |
| pmCherry-C                      | IFT25        | This study                    |
| pmCherry-C                      | IFT27        | This study                    |
| pmCherry-N                      | IFT20        | This study                    |
| pCAG2-mCherry-C                 | IFT38        | This study                    |
| pmCherry-C                      | IFT54        | This study                    |
| pCAG-mCherry-C                  | IFT57        | (Nozaki <i>et al.</i> , 2019) |
| pCAG-mCherry-C                  | IFT46        | (Katoh <i>et al.</i> , 2016)  |
| pCAG-mCherry-C                  | IFT52        | (Katoh <i>et al.</i> , 2016)  |
| pCAG2-mCherry-C                 | IFT56        | This study                    |
| pCAG-mCherry-C                  | IFT70A       | (Takei <i>et al.</i> , 2016)  |
| pCAG-mCherry-C                  | IFT88        | (Katoh <i>et al.</i> , 2016)  |
| pCAG-mCherry-C                  | IFT74        | (Katoh <i>et al.</i> , 2016)  |
| pCAG-mCherry-C                  | IFT81        | (Katoh <i>et al.</i> , 2016)  |
| pCAG-mCherry-N                  | IFT80        | (Katoh <i>et al.</i> , 2016)  |
| pCAG2-mCherry-C                 | IFT172       | (Katoh <i>et al.</i> , 2016)  |
| pCAG2-mCherry-C                 | IFT43        | (Hirano <i>et al.</i> , 2017) |
| pCAG2-mCherry-C                 | IFT121       | (Hirano <i>et al.</i> , 2017) |
| pCAG2-mCherry-C                 | IFT122       | (Hirano <i>et al.</i> , 2017) |
| pCAG2-mCherry-C                 | IFT139       | (Hirano <i>et al.</i> , 2017) |
| pCAG2-mCherry-C                 | IFT140       | (Hirano <i>et al.</i> , 2017) |
| pCAG2-mCherry-C                 | IFT144       | (Hirano <i>et al.</i> , 2017) |
| pRRLsinPPT-mCherry-C-IRES-Blast | ICK          | This study                    |

|                                 |                                        |                              |
|---------------------------------|----------------------------------------|------------------------------|
| pRRLsinPPT-mCherry-C-IRES-Blast | ICK(1–287)                             | This study                   |
| pRRLsinPPT-mCherry-C-IRES-Blast | ICK(285–632)                           | This study                   |
| pRRLsinPPT-mCherry-C-IRES-Blast | ICK(285-561)                           | This study                   |
| pRRLsinPPT-mCherry-C-IRES-Blast | ICK(285–537)                           | This study                   |
| pRRLsinPPT-mCherry-C-IRES-Blast | ICK(285–501)                           | This study                   |
| pRRLsinPPT-mCherry-C-IRES-Blast | ICK(285–473)                           | This study                   |
| pRRLsinPPT-mCherry-C-IRES-Blast | ICK(K33R)                              | This study                   |
| pRRLsinPPT-mCherry-C-IRES-Blast | ICK(T157A)                             | This study                   |
| pRRLsinPPT-mCherry-C-IRES-Blast | ICK(T157E)                             | This study                   |
| pRRLsinPPT-mCherry-C-IRES-Blast | –                                      | This study                   |
| pRRLsinPPT-mCherry-C-IRES-Blast | IFT88                                  | This study                   |
| pRRLsinPPT-EGFP-N-IRES-Zeo      | ARL13B( $\Delta$ GD; 1–19, 190–428 aa) | This study                   |
| pDonor-tBFP-NLS-Neo (Universal) | –                                      | (Katoh <i>et al.</i> , 2017) |
| peSpCas9 (1.1)-2 $\times$ gRNA  | –                                      | (Katoh <i>et al.</i> , 2017) |
| pGEX-6P1                        | anti-GFP Nb                            | (Katoh <i>et al.</i> , 2015) |

**Notes:** All cDNA inserts except for that of anti-GFP Nb are of human origin.

**Table S2. Antibodies used in this study**

| Antibody                                    | Manufacturer or provider | Clone/catalog number or reference         | Dilution (purpose) |
|---------------------------------------------|--------------------------|-------------------------------------------|--------------------|
| Polyclonal rabbit anti-IFT88                | Proteintech              | 13967-1-AP                                | 1:1,000 (IF, IB)   |
| Polyclonal rabbit anti-IFT70                | Proteintech              | 25352-1-AP                                | 1:1,000 (IB)       |
| Polyclonal rabbit anti-IFT139               | Sigma-Aldrich            | HPA035495                                 | 1:1,000 (IB)       |
| Polyclonal rabbit anti-IFT140               | Proteintech              | 17460-1-AP                                | 1:500 (IF)         |
| Polyclonal rabbit anti-GPR161               | Proteintech              | 13398-1-AP                                | 1:200 (IF)         |
| Polyclonal rabbit anti-ARL13B               | Proteintech              | 17711-1-AP                                | 1:1,000 (IF)       |
| Monoclonal mouse anti-ARL13B                | Abcam                    | N29566                                    | 1:500 (IF)         |
| Monoclonal mouse anti-SMO                   | Santa Cruz               | sc-166685                                 | 1:100 (IF)         |
| Monoclonal mouse anti-FOP                   | Abnova                   | 2B1                                       | 1:5,000 (IF)       |
| Monoclonal mouse anti-Ac- $\alpha$ -tubulin | Sigma-Aldrich            | 6-11B-1                                   | 1:1,000 (IF)       |
| Monoclonal mouse anti-RFP                   | MBL                      | 3G5                                       | 1:1,000 (IF)       |
| Monoclonal mouse anti-GFP                   | Proteintech              | 66002-1-Ig                                | 1:5,000 (IB)       |
| Polyclonal rabbit anti-RFP                  | Proteintech              | 26765-1-AP                                | 1:5,000 (IB)       |
| Monoclonal mouse anti-GFP                   | BD Biosciences           | JL-8                                      | 1:1,000 (IB)       |
| Monoclonal mouse anti- $\beta$ -tubulin     | Proteintech              | 66240-1-Ig                                | 1:10,000 (IB)      |
| AlexaFluor-conjugated secondary             | Molecular Probes         | A11034, A21121, A21127,<br>A21137, A21242 | 1:1,000 (IF)       |
| Peroxidase-conjugated secondary             | Jackson ImmunoResearch   | 115-035-166, 111-035-144                  | 1:3,000 (IB)       |

**Notes:** IF, immunofluorescence; IB, immunoblotting

**Table S3: Oligo DNAs used in this study**

| Name                       | Sequence                        |
|----------------------------|---------------------------------|
| pTagBFP-N-RV2 (primer 3)   | 5'-CGTAGAGGAAGCTAGTAGCCAGG-3'   |
| ICK-genome#3-FW (primer 1) | 5'-ACAGCAGTCCAGGCCTCTTTG-3'     |
| ICK-genome#3-RV (primer 2) | 5'-TGCCTCCCTTTCCAGCATTAGTG-3'   |
| ICK-genome#4-FW (primer 4) | 5'-TTGTCAACAGCAGCCCACGG-3'      |
| ICK-genome#4-RV (primer 5) | 5'-AGTGCTGAACAGGGCTGAGC-3'      |
| ICK-gRNA#3-S               | 5'- CACCGGAATGCATGAACCTTCGGG-3' |
| ICK-gRNA#3-AS              | 5'-AAACCCCGAAGGTTTCATGCATTCC-3' |
| ICK-gRNA#4-S               | 5'-CACCGGGCTCCAGAAGTACTCCTG-3'  |
| ICK-gRNA#4-AS              | 5'-AAACCAGGAGTACTTCTGGAGCCC-3'  |

**Video S1. ECV formation from cells shown in Fig. 5C**

The *ICK*-KO cell line (#ICK-4-6) stably expressing ARL13B( $\Delta$ GD)-EGFP was processed for live cell imaging as described in Experimental Procedures.

**Video S2. ECV formation from cells shown in Fig. 5D**

The *ICK*-KO cell line (#ICK-4-6) stably expressing ARL13B( $\Delta$ GD)-EGFP was processed for live cell imaging as described in Experimental Procedures.

**Video S3. ECV formation from cells shown in Fig. 5E**

The *ICK*-KO cell line (#ICK-4-6) stably expressing ARL13B( $\Delta$ GD)-EGFP was processed for live cell imaging as described in Experimental Procedures. Note that this video shows the release of ECVs from the cilia of two independent cells.

**Video S4. ECV formation from cells shown in Fig. 5F**

The *ICK*-KO cell line (#ICK-4-6) stably coexpressing ARL13B( $\Delta$ GD)-EGFP and mChe-IFT88 was processed for live cell imaging as described in Experimental Procedures.

**Video S5. Bidirectional movement of ICK-positive particles within cilia**

The *ICK*-KO cell line (#ICK-4-6) stably coexpressing mChe-ICK(WT) was processed for TIRF microscopy as described in Experimental Procedures.

### Supporting references

- Hirano, T., Katoh, Y., and Nakayama, K. (2017). Intraflagellar transport-A complex mediates ciliary entry as well as retrograde trafficking of ciliary G protein-coupled receptors. *Mol. Biol. Cell* 28, 429-439.
- Katoh, Y., Michisaka, S., Nozaki, S., Funabashi, T., Hirano, T., Takei, R., and Nakayama, K. (2017). Practical method for targeted disruption of cilia-related genes by using CRISPR/Cas9-mediated homology-independent knock-in system. *Mol. Biol. Cell* 28, 898-906.
- Katoh, Y., Nozaki, S., Hartanto, D., Miyano, R., and Nakayama, K. (2015). Architectures of multisubunit complexes revealed by a visible immunoprecipitation assay using fluorescent fusion proteins. *J. Cell Sci.* 128, 2351-2362.
- Katoh, Y., Terada, M., Nishijima, Y., Takei, R., Nozaki, S., Hamada, H., and Nakayama, K. (2016). Overall architecture of the intraflagellar transport (IFT)-B complex containing Cluap1/IFT38 as an essential component of the IFT-B peripheral subcomplex. *J. Biol. Chem.* 291, 10962-10975.
- Nozaki, S., Castro Araya, R.F., Katoh, Y., and Nakayama, K. (2019). Requirement of IFT-B–BBSome complex interaction in export of GPR161 from cilia. *Biol. Open* 8, bio043786.
- Nozaki, S., Katoh, Y., Terada, M., Michisaka, S., Funabashi, T., Takahashi, S., Kontani, K., and Nakayama, K. (2017). Regulation of ciliary retrograde protein trafficking by the Joubert syndrome proteins ARL13B and INPP5E. *J. Cell Sci.* 130, 563-576.
- Takei, R., Katoh, Y., and Nakayama, K. (2018). Robust interaction of IFT70 with IFT52–IFT88 in the IFT-B complex is required for ciliogenesis. *Biol. Open* 7, bio033241.
